# Supplementary material for: Fast pyrolysis of hot-water-extracted and delignified Norway spruce (Picea abies) sawdust by Py–GC/MS
Source: Springer Nature journal article supplement (doi:10.1007/s00226-018-1064-4), 2018-11-14
Supplement: MOESM1 [file 16274062]

Table S1

Peak identification and calibration information of pyrolysis products differently-treated spruce sawdust

| No. | Compound name | Major ion(s) *(m/z)* | RT (min) | Quantification | r2 Value | Slope |
| --- | --- | --- | --- | --- | --- | --- |
|  | Toluene | 51, 65, 91 | 4.6 | Standard | 0.99 | 298.5 |
|  | (2*E*)-Penta-2,4-dienal | 53, 82 | 5.2 | (1*E*)-1-Butene-1,4-diol (standard) | 0.98 | 13.5 |
|  | Pentanal | 58, 86 | 7.3 | Butanal (standard) | 0.99 | 4.1 |
|  | Furfural (furan-2-carbaldehyde) | 39, 95, 96 | 8.0 | Standard | 0.99 | 42.9 |
|  | Cyclopent-2-en-1-one | 39, 82 | 8.3 | Standard | 0.98 | 118.4 |
|  | Ethenylbenzene | 78, 104 | 8.3 | Standard | 0.96 | 191.7 |
|  | Furanmethanol ((furan-2-yl)methanol) | 53, 69, 81, 98 | 8.6 | Standard | 0.99 | 94.2 |
|  | 5-Methyl-2(3*H*)-furanone | 55, 70, 98 | 9.1 | Standard | 0.99 | 56.0 |
|  | Cyclohexanone | 55, 69, 98 | 9.9 | Standard | 0.99 | 51.2 |
|  | 2-Methylcyclopent-2-en-1-one | 53, 67, 96 | 10.3 | Standard | 0.99 | 65.2 |
|  | 1-(2-Furyl)ethanone | 95, 110 | 10.5 | Furanmethanol |  |  |
|  | 2-Cyclopenten-1,4-dione | 54, 68, 98 | 11.2 | 2-Methylcyclopent-2-en-1-one |  |  |
|  | 2-Hydroxycyclopent-2-en-1-one | 55, 69, 98 | 11.8 | 2-Methylcyclopent-2-en-1-one |  |  |
|  | 2-Methylethenylbenzene | 91, 103, 118 | 12.1 | Ethenylbenzene |  |  |
|  | 5*H*-Furan-2-one | 39, 55, 84 | 12.7 | Standard | 0.99 | 24.8 |
|  | 5-Methylfurfural | 53, 109, 110 | 12.8 | Standard | 0.98 | 62.2 |
|  | Phenol | 66, 94 | 12.9 | Standard | 0.98 | 55.1 |
|  | 3-Methylcyclopent-2-en-1-one | 53, 67, 96 | 13.3 | 2-Methylcyclopent-2-en-1-one |  |  |
|  | Pyran-2-one | 39, 68, 96 | 14.3 | 3-Hydroxy-2-methylpyran-4-one |  |  |
|  | 1*H*-Indene | 63, 89, 116 | 14.5 | Standard | 0.99 | 211.2 |
|  | 3-Methyl-2(5*H*)-furanone | 69, 98 | 14.5 | 5-Methyl-2(3*H*)-furanone |  |  |
|  | 2*H*-Pyran-2,6(3*H*)-dione | 55, 84, 112 | 14.8 | 3-Hydroxy-2-methylpyran-4-one |  |  |
|  | 3-Hydroxy-2-penteno-1,5-lactone | 58, 85, 114 | 15.0 | 4-Hydroxy-5-methylfuran-3-one (standard) | 0.97 | 35.2 |
|  | 3-Methyl-1,2-cyclopentanedione | 69, 83, 112 | 15.4 | Standard | 0.98 | 43.6 |
|  | 2-Methylphenol | 39, 51, 79, 107 | 15.5 | Standard | 0.99 | 85.0 |
|  | 4-Methylphenol | 39, 51, 79, 108 | 16.4 | Standard | 0.99 | 82.0 |
|  | 2-Methylbenzofuran | 51, 77, 103, 131 | 16.7 | 1-Benzofuran (standard) | 0.97 | 160.7 |
|  | 2-Methoxyphenol (guaiacol) | 53, 81, 109, 124 | 17.2 | Standard | 0.99 | 79.2 |
|  | 2,6-Dimethylphenol | 77, 107, 122 | 17.3 | Standard | 0.98 | 128.6 |
|  | 4-Methyl-5*H*-furan-2-one | 69, 98 | 17.9 | 5*H*-Furan-2-one |  |  |
|  | 4-Hydroxy-2,5-dimethylfuran-3-one | 43, 57, 85, 128 | 18.1 | Standard | 0.99 | 41.6 |
|  | Methylfuran-2-carboxylate | 39, 95, 126 | 18.1 | Furfural (furan-2-carbaldehyde) |  |  |
|  | 2*H*-Pyran-2-one-4-hydroxy-6-methyl | 43, 69, 98, 126 | 18.3 | 3-Hydroxy-2-methylpyran-4-one |  |  |
|  | 1-Methyl-1*H*-indene | 115, 130 | 18.3 | 1*H*-Indene |  |  |
|  | 3-Ethyl-2-hydroxycyclopent-2-en-1-one | 55, 69, 83, 126 | 18.4 | 2-Methylcyclopent-2-en-1-one |  |  |
|  | 2-Ethylphenol | 77, 107, 122 | 18.4 | 2,6-Dimethylphenol |  |  |
|  | 2,4-Dimethylphenol | 65, 77, 107, 122 | 18.9 | 2,6-Dimethylphenol |  |  |
|  | 2,5-Furandicarboxaldehyde | 53, 67, 95, 124 | 19.1 | Standard | 0.99 | 83.0 |
|  | 3-Hydroxy-2-methylpyran-4-one | 43, 55, 71, 126 | 19.2 | Standard | 0.98 | 74.5 |
|  | 3,5-Dimethylphenol | 77, 91, 107, 122 | 19.8 | Standard | 0.98 | 87.7 |
|  | 2-Methoxy-3-methylphenol | 77, 95, 123, 138 | 20.1 | 2-Methoxy-4-methylphenol |  |  |
|  | Naphthalene | 51, 102, 128 | 20.4 | Standard | 0.99 | 178.8 |
|  | 2,3-Dihydroxybenzaldehyde | 51, 64, 92, 120, 138 | 20.5 | Standard | 0.99 | 119.0 |
|  | 2-Methoxy-4-methylphenol | 67, 123, 138 | 20.7 | Standard | 0.99 | 275.0 |
|  | 2,3,5-Trimethylphenol | 77, 91, 121, 136 | 20.8 | 2,3,6-Trimethylphenol |  |  |
|  | 6-Ethyl-*o*-cresol | 77, 91, 107, 121, 136 | 21.5 | *o*-Cresol (standard) | 0.99 | 85.0 |
|  | 1,2-Dihydroxybenzene (catechol) | 64, 81, 110 | 21.7 | Standard | 0.98 | 57.3 |
|  | 3,5-Dihydroxy-2-methylpyran-4-one | 68, 85, 113, 142 | 21.8 | 3-Hydroxy-2-methylpyran-4-one |  |  |
|  | 2,3,6-Trimethylphenol | 77, 91, 121, 136 | 22.0 | Standard | 0.98 | 222.0 |
|  | 4-Ethenylphenol | 65, 91, 120 | 22.1 | 3,5-Dimethylphenol |  |  |
|  | 6-Methyldihydro-2*H*-pyran-3(4*H*)-one | 56, 84, 114 | 22.4 | 3-Hydroxy-2-methylpyran-4-one |  |  |
|  | 2,3-Dimethoxytoluene | 91, 109, 137, 152 | 22.5 | 1,2-Dihydroxy-3-methylbenzene |  |  |
|  | 4-Hydroxy-2-methylacetophenone | 77, 107, 135, 150 | 22.7 | 2-Methoxy-4-methylphenol (standard) |  |  |
|  | (1*R*,5*S*)-1-Hydroxy-3,6-dioxabicyclo[3.2.1]octan-2-one | 57, 69, 85, 116, 144 | 23.2 | Levoglucosan |  |  |
|  | 2′,5′-Dihydroxyacetophenone (1-(2,5-dihydroxyphenyl)ethanone) | 69, 109, 137, 152 | 23.4 | 1,4-Dihydroxybenzene |  |  |
|  | 2-Methoxy-4-ethylphenol | 137, 152 | 23.5 | 2-Methoxy-4-methylphenol |  |  |
|  | 1,2-Dihydroxy-3-methylbenzene | 51, 78, 106, 124 | 23.7 | Standard | 0.97 | 155.0 |
|  | 2-Methylnaphthalene |  | 24.2 | Naphthalene |  |  |
|  | 4-(Prop-2-en-1-yl)phenol | 77, 91, 107, 115, 134 | 24.5 | 4-Methylphenol |  |  |
|  | 5-(Hydroxymethyl)furfural | 39, 97, 109, 126 | 24.7 | Standard | 0.97 | 73.0 |
|  | 1,2-Dihydroxy-4-methylbenzene | 39, 78, 107, 124 | 25.0 | 1,2-Dihydroxy-3-methylbenzene |  |  |
|  | 4-Ethenyl-2-methoxyphenol | 51, 77, 107, 135, 150 | 25.4 | Standard | 0.97 | 251.5 |
|  | 2´-Hydroxy-5´-methoxy-acetophenone | 95, 123, 151, 166 | 25.8 | 2-Methoxy-4-methylphenol (standard) |  |  |
|  | 2-Methoxy-4-ethyl-6-methylphenol | 77, 136, 151, 166 | 25.9 | 2-Methoxy-4-(prop-2-en-1-yl)phenol (eugenol) | 0.97 | 331.2 |
|  | 5-Methyl-3-methoxyphenol | 107, 109, 123, 138 | 26.1 | 2-Methoxy-4-methylphenol |  |  |
|  | 2-Methoxy-4-(prop-2-en-1-yl)phenol (eugenol) | 77, 131, 149, 164 | 26.4 | 2-Methoxy-4-(prop-2-en-1-yl)phenol (eugenol) | 0.97 | 331.0 |
|  | 5-Acetoxymethyl-2-furaldehyde | 79, 97, 109, 126 | 26.6 | 5-(Hydroxymethyl)furfural |  |  |
|  | 1*H*-Indenol | 77, 103, 115, 132 | 27.5 | 1*H*-Indene |  |  |
|  | 4-Ethyl-1,3-benzenediol | 128, 138 | 27.9 | 1,2-Dihydroxy-3-methylbenzene |  |  |
|  | 2-Methoxy-4-(prop-1-en-1-yl)phenol (isoeugenol) | 91, 103, 131, 149, 164 | 29.8 | Standard | 0.97 | 151.0 |
|  | 2-Methoxy-4-propylphenol | 77, 122, 137, 166 | 31.6 | 2-Methoxy-4-(prop-2-en-1-yl)phenol (eugenol) |  |  |
|  | 1-(4-Hydroxy-3-methoxyphenyl)-ethan-1-one | 77, 123, 151, 166 | 32.4 | 4-Hydroxy-3-methoxybenzoic acid (vanillic acid) (standard) | 0.98 | 154.7 |
|  | Guaiacylacetone | 122, 137, 180 | 33.6 | 2-Methoxy-4-(prop-2-en-1-yl)phenol (eugenol) |  |  |
|  | 1,6-Anhydro-β-D-glucopyranose (levoglucosan) | 60, 73, 126, 145 | 34.5 | Standard | 0.99 | 67.0 |
|  | (2*E*)-3-(4-hydroxy-2-methoxyphenyl)-2-propenal | 77, 107, 135, 161, 178 | 40.1 | 2-Methoxy-4-(prop-2-en-1-yl)phenol (eugenol) |  |  |

In all cases, the intercept was 0.0.
